# Supplementary material for: Unpaved road particulate matter emission rates and vehicle-induced transient plume characteristics
Source: Royal Society of Chemistry journal article supplement (doi:10.1039/d4ea00055b), 2024-01-01
Supplement: d4ea00055b1.pdf [file d4ea00055b1.pdf]

## Supplemental Information

### Use of Inverse Modeling to determine Particulate Emission Rates from Rural Unpaved Roads

James Kacer<sup>a</sup>, Ralph Altmaier<sup>b</sup>, David M. Cwiertny<sup>c,d</sup> Patrick T. O'Shaughnessy<sup>b</sup>

<sup>a</sup> Center for Health Effects of Environmental Contamination, W195 Chemistry Building, University of Iowa, Iowa City, Iowa, 52242

<sup>b</sup> Department of Occupational and Environmental Health, College of Public Health, University of Iowa

<sup>c</sup> Department of Civil and Environmental Engineering, College of Engineering, University of Iowa

<sup>d</sup> Director, Center for Health Effects of Environmental Contamination, W195 Chemistry Building, University of Iowa, Iowa City, Iowa, 52242

## Tables

**Table S1** Descriptive Statistics of Hourly PM<sub>10</sub> Measurements at Sites 1 and 2.

| Parameter       | Site 1<br>µg/m <sup>3</sup> | Site 2<br>µg/m <sup>3</sup> |
|-----------------|-----------------------------|-----------------------------|
| Sample Size     | 871                         | 558                         |
| Geometric Mean  | 50 (3.3 <sup>1</sup> )      | 26 (2.0)                    |
| Arithmetic Mean | 106 (162 <sup>2</sup> )     | 34 (30.6)                   |
| Minimum         | 1                           | 0                           |
| Maximum         | 1717                        | 256                         |

<sup>1</sup>Geometric standard deviation

<sup>2</sup>Standard deviation

**Table S2** Descriptive Statistics of Emission Rates and Emission Factors (n = 64).

| Parameter       | Emission Rate,<br>g/s     | Emission Rate/<br>Vehicle, g/s-V | Emission Factor,<br>g/VKT |
|-----------------|---------------------------|----------------------------------|---------------------------|
| Geometric Mean  | 1.09 (4.9 <sup>1</sup> )  | 0.26 (4.3 <sup>1</sup> )         | 444 (4.3 <sup>1</sup> )   |
| Arithmetic Mean | 3.34 (5.67 <sup>2</sup> ) | 0.67 (1.06)                      | 1153 (1826)               |
| Minimum         | 0.02                      | 0.01                             | 8.5                       |
| Maximum         | 25.70                     | 4.28                             | 8430                      |

<sup>1</sup>Geometric standard deviation

<sup>2</sup>Standard deviation

**Table S3.** Summary of Sensitivity Analysis of Variables Affecting the Value of the AP-42 Emission Factor

| Variable   | Variable<br>Range | Variable<br>Mid-value | Unit<br>Change <sup>1</sup> | Range<br>Change <sup>2</sup> |
|------------|-------------------|-----------------------|-----------------------------|------------------------------|
| % Silt     | 1 - 16            | 8                     | 50                          | 745                          |
| % Moisture | 0.4 – 1.2         | 0.8                   | -113                        | -90                          |
| Speed, kph | 48 - 113          | 80                    | 2.5                         | 162                          |

<sup>1</sup>Change in emission factor per unit change of the variable

<sup>2</sup>Change in emission factor from lowest to highest value of the variable

**Table S4.** Sensitivity of the Inversely Modeled Emission Rate (G/S) to Changes in Vehicle Width and Vehicle Height

|                   |      | Vehicle Width, m   |                    |                    |                    |                    |                    |
|-------------------|------|--------------------|--------------------|--------------------|--------------------|--------------------|--------------------|
|                   |      | 1.73               | 1.83               | 2.21               | 2.59               | 2.59               | 5.03               |
| Vehicle height, m | 1.42 | 0.647 <sup>1</sup> |                    |                    |                    |                    | 0.650              |
|                   | 1.45 | 0.648              | 0.649 <sup>2</sup> |                    |                    |                    | 0.651              |
|                   | 2.03 | 0.671              |                    | 0.672 <sup>3</sup> |                    |                    | 0.676              |
|                   | 3.53 | 0.798              |                    |                    | 0.798 <sup>4</sup> |                    | 0.801              |
|                   | 4.11 | 0.857              |                    |                    |                    | 0.857 <sup>5</sup> | 0.860              |
|                   | 3.81 | 0.825              |                    |                    |                    |                    | 0.829 <sup>6</sup> |

<sup>1</sup>Small car<sup>2</sup>Medium car<sup>3</sup>Pickup truck/SUV<sup>4</sup>Grain truck<sup>5</sup>Tractor-trailer<sup>6</sup>Farm combine, transport width and height**Table S5** Descriptive Statistics for Vehicle-Generated Plume Characteristics (n = 147).

|         | Average Conc.<br>µg/m <sup>3</sup> | Max Conc.<br>µg/m <sup>3</sup> | Total Mass<br>µg         | Time to Peak<br>sec      | Residence Time<br>sec   |
|---------|------------------------------------|--------------------------------|--------------------------|--------------------------|-------------------------|
| Geomean | 4278 (1.96 <sup>1</sup> )          | 18743 (2.19 <sup>1</sup> )     | 3.4 (2.57 <sup>1</sup> ) | 8.2 (1.98 <sup>1</sup> ) | 7.4 (5.2 <sup>1</sup> ) |
| Minimum | 1137                               | 2385                           | 0.3                      | 2.0                      | 2.2                     |
| Maximum | 32780                              | 221017                         | 54.0                     | 62.0                     | 147                     |

<sup>1</sup>Geometric standard deviation**Table S6.** Regression Coefficients for Plume Sampling Outcomes

|                | In Maximum Concentration | In Average Concentration | In Time to Peak Concentration | In Residence Time | In Total Mass |
|----------------|--------------------------|--------------------------|-------------------------------|-------------------|---------------|
| vehicle speed  | 0.021***                 | 0.016***                 | 0.001                         | 0.003             | 0.022***      |
| wind speed     | -0.047*                  | -0.048**                 | -0.108***                     | -0.056***         | -0.132***     |
| wind direction | 0.006                    | 0.004                    | 0.004                         | -0.007*           | 0.001         |

p: \*&lt;0.05, \*\*&lt;0.01, \*\*\*&lt;0.001

## Figures

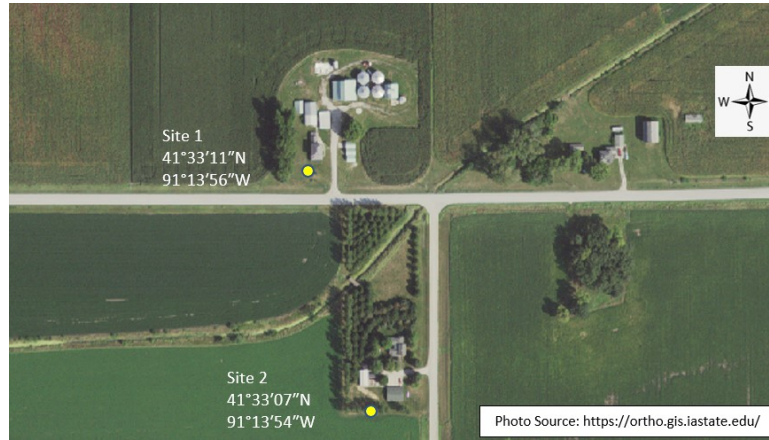

**Fig. S1.** Site 1 and Site 2 BAM sample locations.

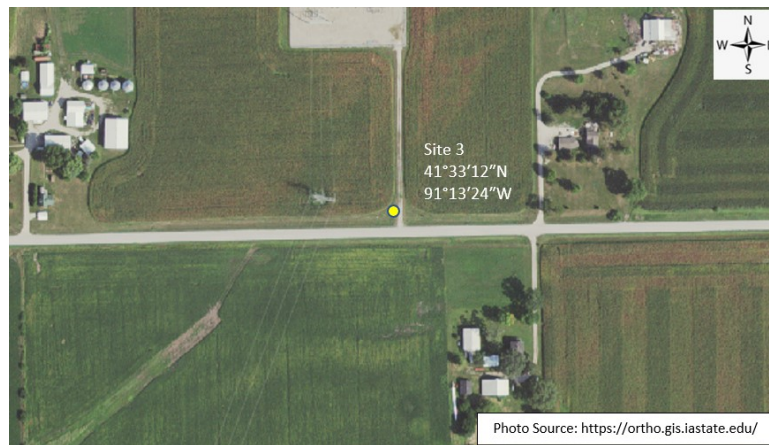

**Fig. S2.** Site 3 southerly-wind aerosol photometer sampling site.

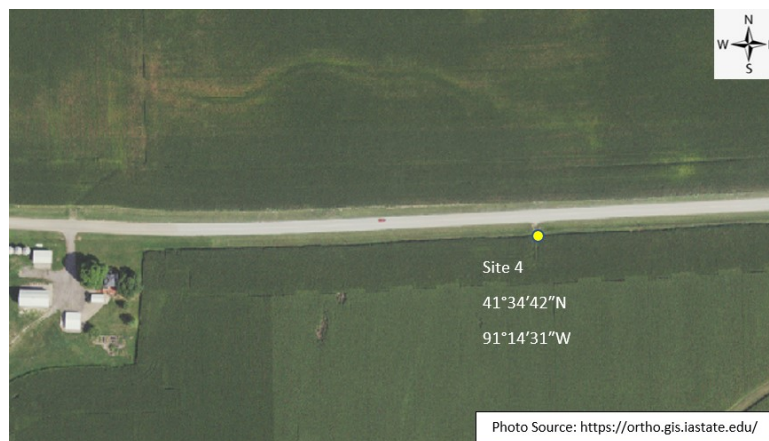

**Fig. S3.** Site 4 northerly-wind aerosol photometer sampling site.

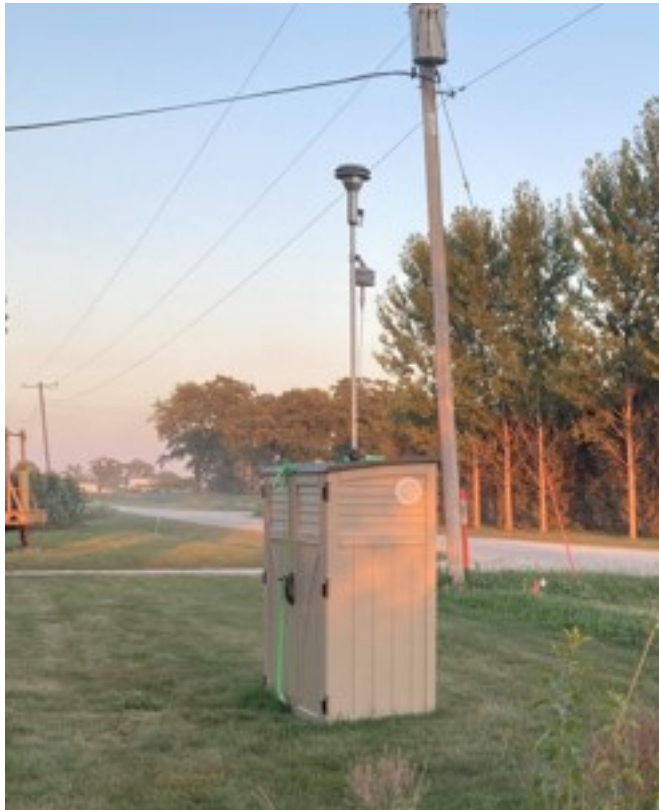

**Fig. S4.** The Site 1 sample shed containing a BAM monitor positioned near a rural unpaved road.

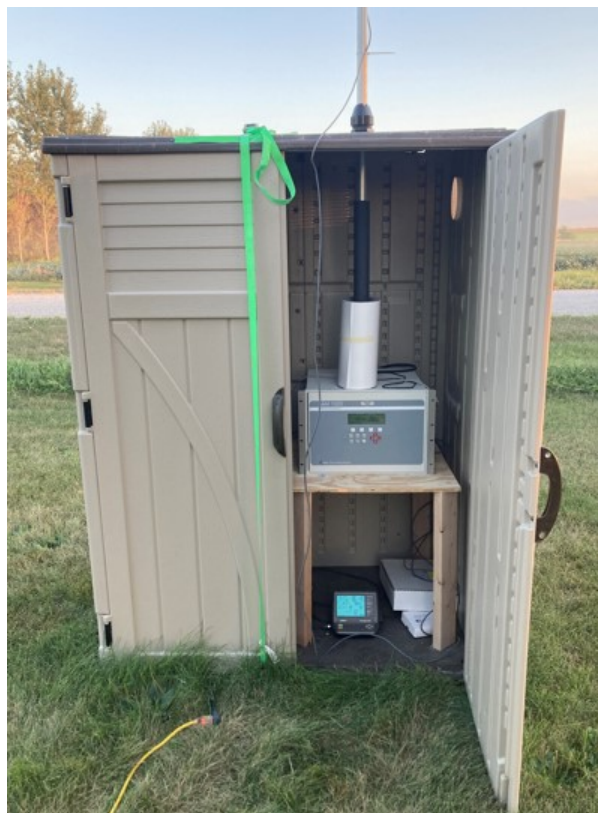

**Fig. S5.** The Site 1 sample shed showing configuration of the BAM monitor.

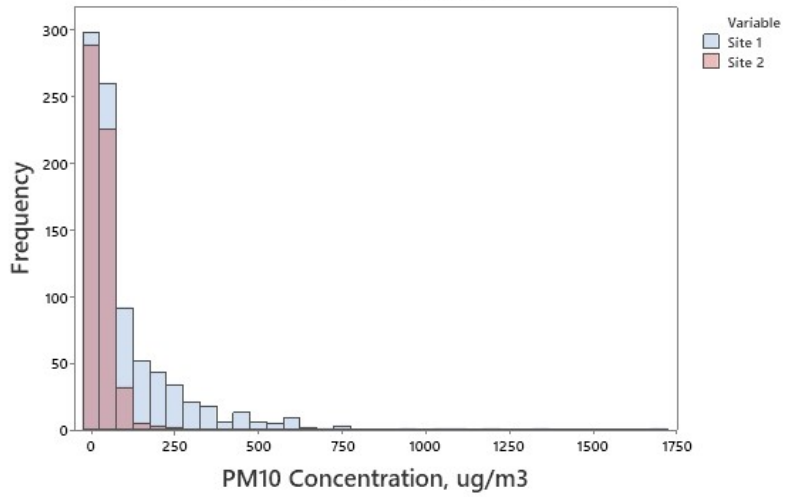

**Fig. S6.** Site 1 and Site 2 PM<sub>10</sub> concentration frequency distributions.

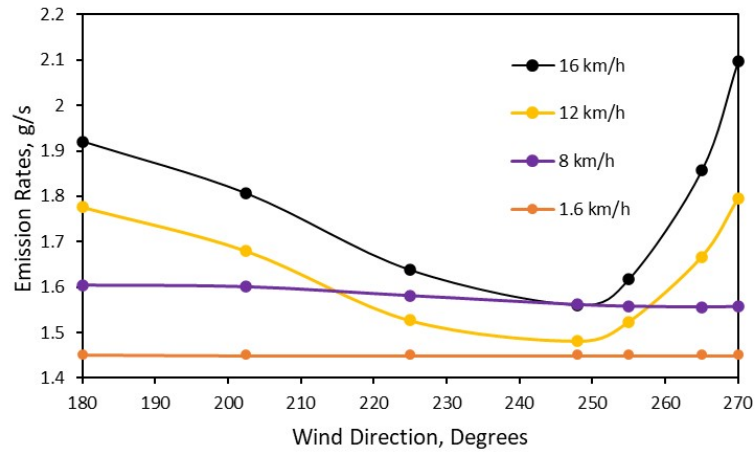

**Fig. S7.** Inverse modeled emission rates given varying wind directions and wind speeds while all other model inputs remained constant over a one-hour meteorological period.

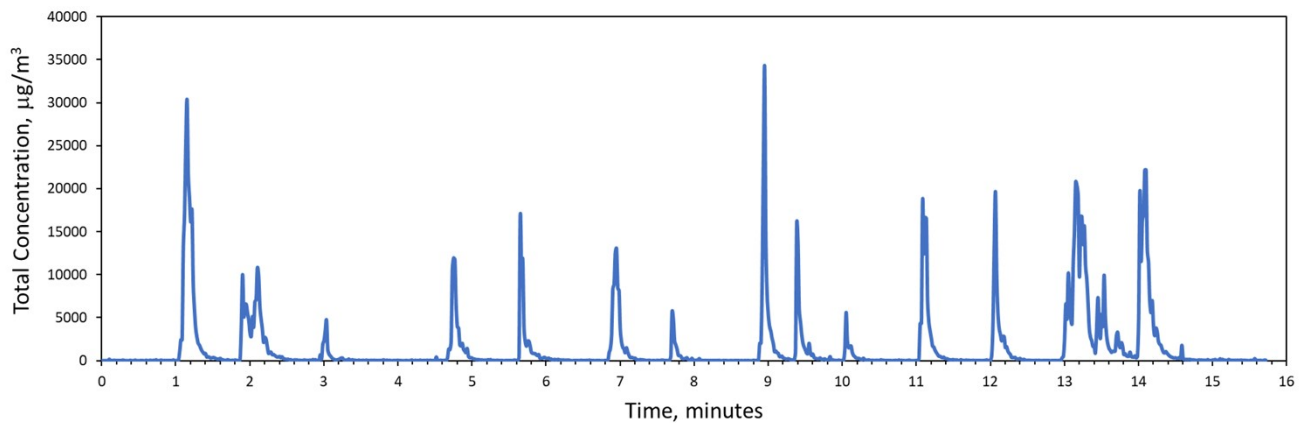

**Fig. S8.** Particulate matter plume profiles resulting from a car passing the aerosol photometer every one to three minutes.
